# Supplementary material
Source: PubMed Central journal article supplement (PMC6068130)
Supplement: 41423_2018_81_MOESM1_ESM.pdf [file 41423_2018_81_MOESM1_ESM.pdf]

# IDO1 in cancer: a Gemini of immune checkpoints

Lijie Zhai<sup>1</sup>, Erik Ladomersky<sup>1</sup>, Alicia Lenzen<sup>2,3,4</sup>, Brenda Nguyen<sup>1</sup>,  
Ricky Patel<sup>1</sup>, Kristen L. Lauing<sup>1</sup>, Meijing Wu<sup>1</sup>, Derek A. Wainwright<sup>1,5,6,7,8</sup>

<sup>1</sup>Department of Neurological Surgery, <sup>2</sup>Department of Pediatrics, <sup>3</sup>Division of Hematology,  
Oncology and Stem Cell Transplantation, <sup>4</sup>Ann & Robert H. Lurie Children's Hospital of  
Chicago, <sup>5</sup>Department of Medicine-Hematology/Oncology, <sup>6</sup>Department of Microbiology-  
Immunology, <sup>7</sup>Department of Medicine-Division of Hematology and Oncology <sup>7</sup>Brain Tumor  
Institute, <sup>8</sup>Robert H. Lurie Comprehensive Cancer Center of Northwestern University,  
Northwestern University, Chicago, IL 60611, USA

## Supplementary Material and Methods

### *The cancer genome atlas (TCGA) sample description*

The TCGA data for all cancer types analyzed were accessed from the UCSC Xena browser (<http://xena.ucsc.edu/>). mRNA expression data represented by RNASeq (Illumina Hi-seq platform) includes RSEM normalized level 3 data present in TCGA as of April 13th, 2017.

### *Statistical analysis*

The cutoff value for each gene expression level was determined with Cutoff Finder software (<http://molpath.charite.de/cutoff/>) using significance as the cutoff optimization method (25). Kaplan-Meier (KM) survival analysis was performed to estimate the survival distribution, while the log-rank test was used to assess the statistical significance of differences between the stratified survival groups using GraphPad Prism (version 6, GraphPad Software, Inc., La Jolla, CA). Renyi family of test statistics was computed via SAS software (version 9.4, SAS Institute Inc., Cary, NC) to determine the survival difference between two groups given the presence of crossing hazard rates. The correlation between *IDO1* mRNA levels and CD8<sup>+</sup> T cells (CD3<sup>+</sup>CD8<sup>+</sup>) were examined

26 by Canonical Correlation analysis, where each cell type was defined by a linear combination of  
27 the corresponding signature marker genes. Differences were considered to be statistically  
28 significant when  $P < 0.05$ .
